# Supplementary material for: Predict Epitranscriptome Targets and Regulatory Functions of N6-Methyladenosine (m6A) Writers and Erasers
Source: PubMed Central journal article supplement — Evol Bioinform Online. 2019 Sep 5;15:1176934319871290. doi: 10.1177/1176934319871290 (PMC6728658; doi:10.1177/1176934319871290), 2019-09-05
Supplement: Supplement_Table_2.pdf [file Supplement_Table_2.pdf]

Table S2 Prediction performance of 5 different machine learning approaches

|                        |      | Writers<br>(M3/M14 vs M16) |       |       |       |       | Erasers<br>(FTO vs ALKBH5) |       |       |       |       |
|------------------------|------|----------------------------|-------|-------|-------|-------|----------------------------|-------|-------|-------|-------|
|                        |      | RF                         | SVM   | GLM   | NB    | DT    | RF                         | SVM   | GLM   | NB    | DT    |
| Dataset 1<br>(P > 0.6) | Sens | 0.804                      | 0.657 | 0.580 | 0.738 | 0.414 | 0.796                      | 0.818 | 0.802 | 0.724 | 0.668 |
|                        | Spec | 0.795                      | 0.642 | 0.591 | 0.379 | 0.717 | 0.799                      | 0.816 | 0.803 | 0.814 | 0.766 |
|                        | ROC  | 0.889                      | 0.697 | 0.608 | 0.597 | 0.580 | 0.873                      | 0.884 | 0.872 | 0.847 | 0.884 |
|                        | ACC  | 0.800                      | 0.650 | 0.585 | 0.558 | 0.565 | 0.797                      | 0.817 | 0.803 | 0.762 | 0.706 |
|                        | MCC  | 0.599                      | 0.299 | 0.171 | 0.124 | 0.137 | 0.595                      | 0.633 | 0.605 | 0.531 | 0.423 |
| Dataset 2<br>(P > 0.7) | Sens | 0.799                      | 0.649 | 0.568 | 0.706 | 0.418 | 0.797                      | 0.816 | 0.802 | 0.852 | 0.693 |
|                        | Spec | 0.805                      | 0.629 | 0.589 | 0.403 | 0.706 | 0.803                      | 0.815 | 0.807 | 0.668 | 0.752 |
|                        | ROC  | 0.888                      | 0.691 | 0.603 | 0.589 | 0.583 | 0.873                      | 0.885 | 0.872 | 0.849 | 0.885 |
|                        | ACC  | 0.802                      | 0.639 | 0.579 | 0.554 | 0.562 | 0.800                      | 0.816 | 0.804 | 0.726 | 0.720 |
|                        | MCC  | 0.605                      | 0.278 | 0.157 | 0.114 | 0.130 | 0.600                      | 0.632 | 0.608 | 0.483 | 0.443 |
| Dataset 3<br>(P > 0.8) | Sens | 0.833                      | 0.673 | 0.624 | 0.870 | 0.561 | 0.791                      | 0.815 | 0.798 | 0.876 | 0.676 |
|                        | Spec | 0.809                      | 0.630 | 0.556 | 0.198 | 0.584 | 0.795                      | 0.818 | 0.805 | 0.630 | 0.769 |
|                        | ROC  | 0.911                      | 0.710 | 0.615 | 0.601 | 0.577 | 0.872                      | 0.884 | 0.872 | 0.851 | 0.884 |
|                        | ACC  | 0.821                      | 0.652 | 0.590 | 0.534 | 0.573 | 0.793                      | 0.816 | 0.801 | 0.686 | 0.716 |
|                        | MCC  | 0.643                      | 0.304 | 0.181 | 0.092 | 0.145 | 0.586                      | 0.633 | 0.602 | 0.424 | 0.440 |
| Dataset 4<br>(P > 0.9) | Sens | 0.799                      | 0.669 | 0.617 | 0.880 | 0.552 | 0.822                      | 0.821 | 0.769 | 0.811 | 0.671 |
|                        | Spec | 0.779                      | 0.605 | 0.563 | 0.179 | 0.576 | 0.794                      | 0.831 | 0.761 | 0.616 | 0.703 |
|                        | ROC  | 0.877                      | 0.687 | 0.604 | 0.595 | 0.570 | 0.888                      | 0.899 | 0.831 | 0.814 | 0.899 |
|                        | ACC  | 0.789                      | 0.637 | 0.590 | 0.530 | 0.564 | 0.806                      | 0.826 | 0.765 | 0.669 | 0.686 |
|                        | MCC  | 0.578                      | 0.275 | 0.180 | 0.083 | 0.129 | 0.611                      | 0.652 | 0.530 | 0.380 | 0.373 |

Note: RF: Random Forest; SVM: Support Vector Machine; GLM: generalized linear model; NB: Naïve Bayes; DT: decision tree.
